# Supplementary material
Source: HighWire-hosted journal article supplement (https://erj.ersjournals.com/content/58/2/2004042)
Supplement: inline-supplementary-material-2 [file inline-supplementary-material-2.pdf]

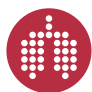

# The Noninvasive Ventilation Outcomes (NIVO) score: prediction of in-hospital mortality in exacerbations of COPD requiring assisted ventilation

SHAREABLE PDF

Tom Hartley<sup>1,2</sup>, Nicholas D. Lane<sup>1,2</sup>, John Steer<sup>1,2</sup>, Mark W. Elliott<sup>3</sup>, Milind P. Sovani<sup>4</sup>, Helen Jane Curtis<sup>5</sup>, Elizabeth R. Fuller<sup>6,7</sup>, Patrick B. Murphy<sup>8,9</sup>, Dinesh Shrikrishna<sup>10</sup>, Keir E. Lewis<sup>11,12</sup>, Neil R. Ward<sup>13</sup>, Chris D. Turnbull<sup>14,15</sup>, Nicholas Hart<sup>8,9</sup> and Stephen C. Bourke<sup>1,2</sup>

<sup>1</sup>Translational and Clinical Research Institute, Newcastle University, Newcastle upon Tyne, UK. <sup>2</sup>Department of Respiratory Medicine, Northumbria Healthcare NHS Foundation Trust, North Shields, UK. <sup>3</sup>Respiratory Medicine, Leeds Teaching Hospital NHS Trust, Leeds, UK. <sup>4</sup>Department of Respiratory Medicine, Nottingham University Hospitals NHS Trust, Nottingham, UK. <sup>5</sup>Respiratory and Critical Care Medicine, Gateshead Health NHS Foundation Trust, Gateshead, UK. <sup>6</sup>Department of Respiratory Medicine, South Tyneside and Sunderland NHS Foundation Trust, South Shields, UK. <sup>7</sup>Population Health Sciences Institute, Newcastle University, Newcastle upon Tyne, UK. <sup>8</sup>Lane Fox Unit, Guy's and St Thomas' NHS Foundation Trust, London, UK. <sup>9</sup>Centre for Human and Applied Physiological Sciences, King's College London, London, UK. <sup>10</sup>Respiratory Medicine, Musgrove Park Hospital, Somerset NHS Foundation Trust, Taunton, UK. <sup>11</sup>Respiratory Medicine, Hywel Dda University Health Board, Llanelli, UK. <sup>12</sup>School of Medicine, University of Swansea, Swansea, UK. <sup>13</sup>Respiratory Medicine, University Hospitals Plymouth NHS Trust, Plymouth, UK. <sup>14</sup>Oxford Centre for Respiratory Medicine, Oxford University Hospitals NHS Foundation Trust, Oxford, UK. <sup>15</sup>Nuffield Department of Medicine, University of Oxford, Oxford, UK.

Corresponding author: Stephen C. Bourke ([Stephen.Bourke@northumbria-healthcare.nhs.uk](mailto:Stephen.Bourke@northumbria-healthcare.nhs.uk))

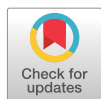

Shareable abstract (@ERSpublications)

The NIVO score was created to predict in-hospital mortality in exacerbations of COPD requiring assisted ventilation. Prospective validation under real-world conditions in 10 UK hospitals shows it easily outperforms existing alternative scores. <https://bit.ly/3oKMZdl>

**Cite this article as:** Hartley T, Lane ND, Steer J, *et al.* The Noninvasive Ventilation Outcomes (NIVO) score: prediction of in-hospital mortality in exacerbations of COPD requiring assisted ventilation. *Eur Respir J* 2021; 58: 2004042 [DOI: 10.1183/13993003.04042-2020].

This single-page version can be shared freely online.

Copyright ©The authors 2021

This version is distributed under the terms of the Creative Commons Attribution Non-Commercial Licence 4.0. For commercial reproduction rights and permissions contact [permissions@ersnet.org](mailto:permissions@ersnet.org)

This article has supplementary material available from [erj.ersjournals.com](http://erj.ersjournals.com)

This article has an editorial commentary: <https://doi.org/10.1183/13993003.00336-2021>

Received: 1 Nov 2020  
Accepted: 29 Dec 2020

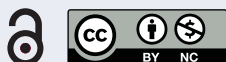

## Abstract

**Introduction** Acute exacerbations of COPD (AECOPD) complicated by acute (acidaemic) hypercapnic respiratory failure (AHRF) requiring ventilation are common. When applied appropriately, ventilation substantially reduces mortality. Despite this, there is evidence of poor practice and prognostic pessimism. A clinical prediction tool could improve decision making regarding ventilation, but none is routinely used.

**Methods** Consecutive patients admitted with AECOPD and AHRF treated with assisted ventilation (principally noninvasive ventilation) were identified in two hospitals serving differing populations. Known and potential prognostic indices were identified *a priori*. A prediction tool for in-hospital death was derived using multivariable regression analysis. Prospective, external validation was performed in a temporally separate, geographically diverse 10-centre study. The trial methodology adhered to TRIPOD (Transparent Reporting of a Multivariable Prediction Model for Individual Prognosis or Diagnosis) recommendations.

**Results** Derivation cohort: n=489, in-hospital mortality 25.4%; validation cohort: n=733, in-hospital mortality 20.1%. Using six simple categorised variables (extended Medical Research Council Dyspnoea score 1–4/5a/5b, time from admission to acidaemia >12 h, pH <7.25, presence of atrial fibrillation, Glasgow coma scale ≤14 and chest radiograph consolidation), a simple scoring system with strong prediction of in-hospital mortality is achieved. The resultant Noninvasive Ventilation Outcomes (NIVO) score had area under the receiver operating curve of 0.79 and offers good calibration and discrimination across stratified risk groups in its validation cohort.

**Discussion** The NIVO score outperformed pre-specified comparator scores. It is validated in a generalisable cohort and works despite the heterogeneity inherent to both this patient group and this intervention.

Potential applications include informing discussions with patients and their families, aiding treatment escalation decisions, challenging pessimism and comparing risk-adjusted outcomes across centres.
